# Supplementary material for: Combining Mg–Zn–Ca Bulk Metallic Glass with a Mesoporous Silica Nanocomposite for Bone Tissue Engineering
Source: MDPI journal article supplement (doi:10.3390/pharmaceutics14051078), 2022-05-17
Supplement: s1 [file s1]

## Supplementary Materials

# Combining Mg-Zn-Ca Bulk Metallic Glass with a Mesoporous Silica Nanocomposite for Bone Tissue Engineering

Yun Shin Chu, Pei-Chun Wong, Jason Shian-Ching Jang, Chih-Hwa Chen, Si-Han Wu \*

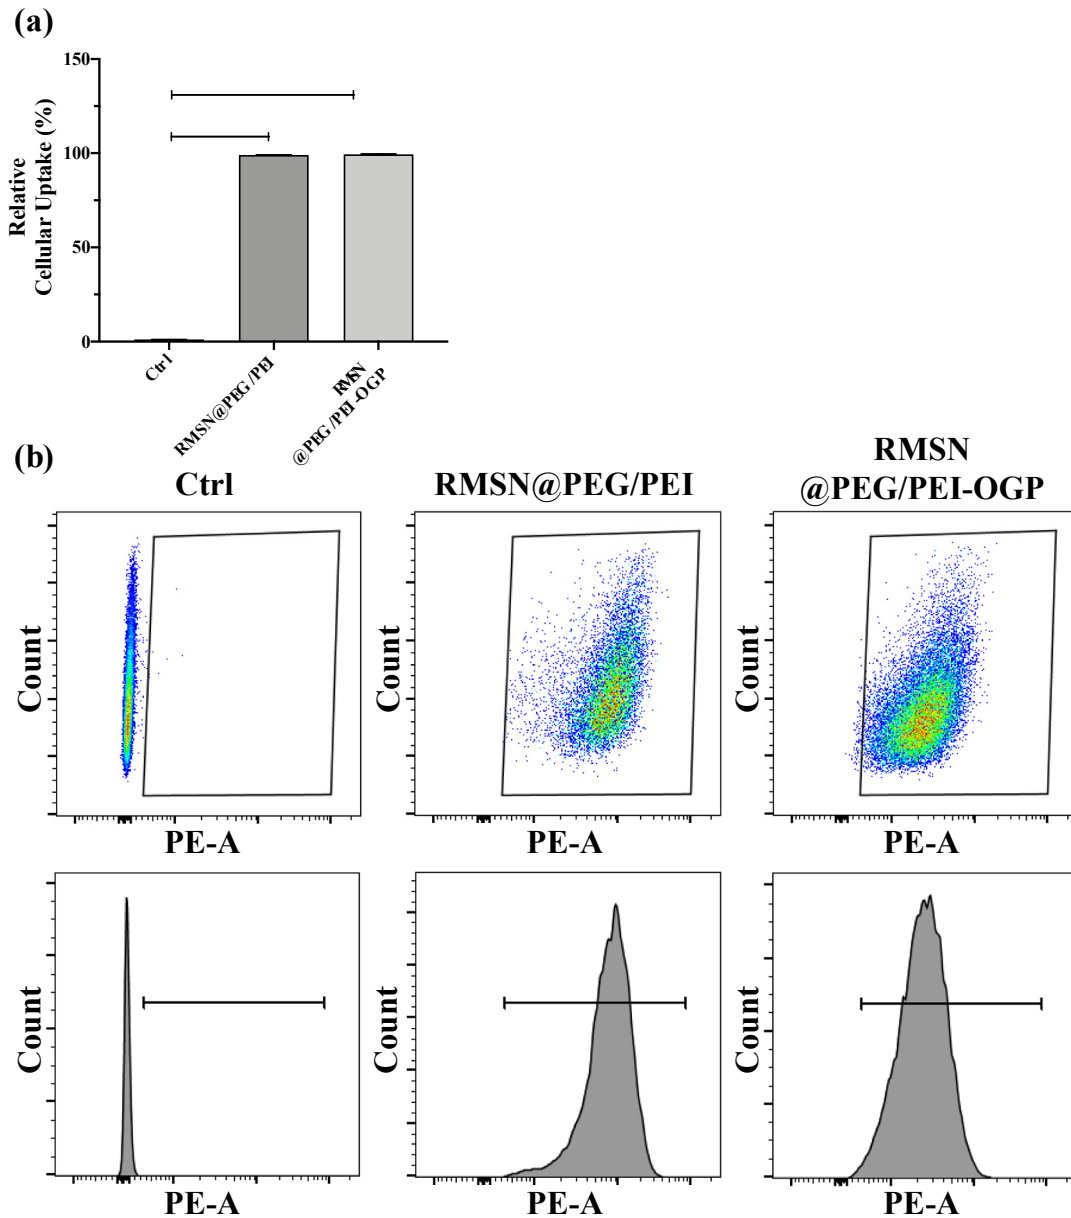

**Supplementary Figure S1.** (A) Flow cytometric analysis and (B) the quantitative chart of flow cytometry analysis of MC3T3-E1 cells at 24 h post-treatment with nanoparticles. The amount of nanoparticles were 50  $\mu\text{g/mL}$ . (n=3 per group) [Data are mean  $\pm$  S.D., \*\*\*\*  $p < 0.0001$ ].

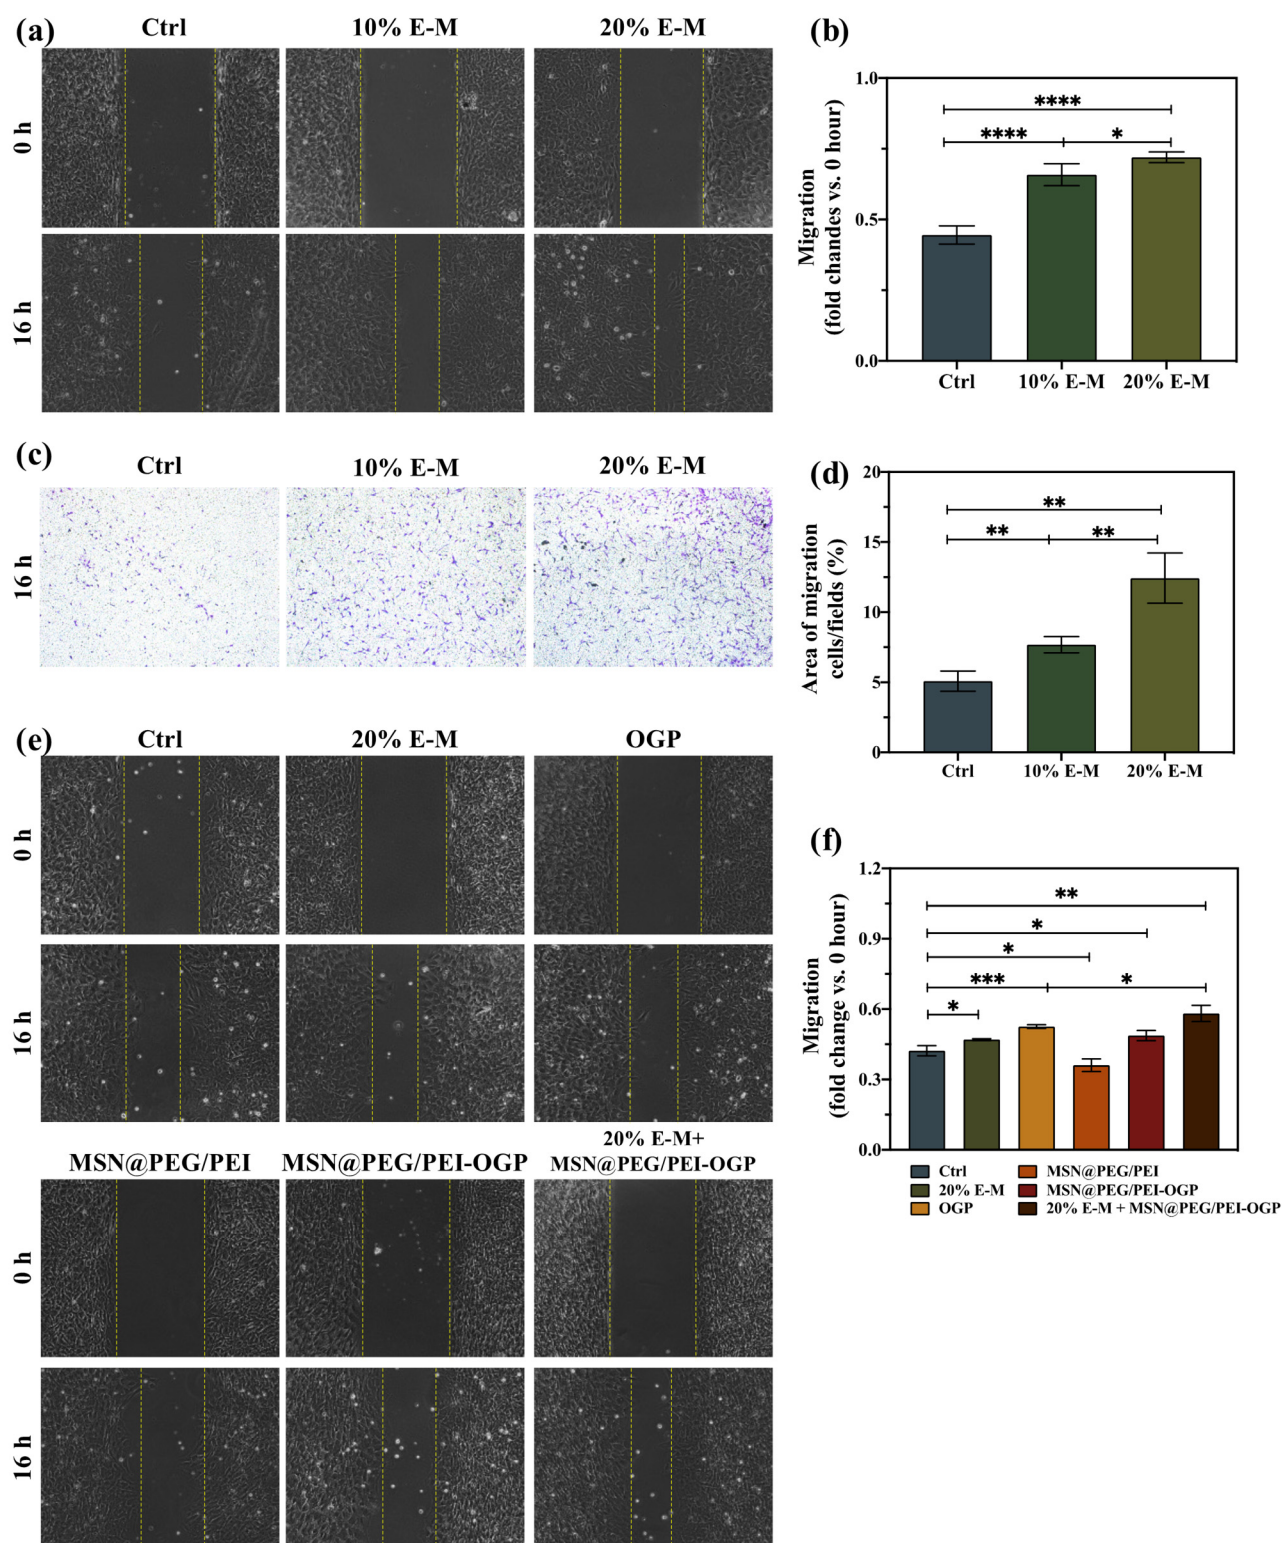

**Supplementary Figure S2.** (A) The morphology of MC3T3-E1 cells in wound healing assay with different ratio of extracted- $\alpha$ MEM. (B) The transwell assay of different concentration of extracted- $\alpha$ MEM. (C) The morphology of MC3T3-E1 cells at 24 h post-treatment with different condition of wound healing assay. The quantitative chart of (D) wound healing assay and (E) transwell assay with different ratio of extracted- $\alpha$ MEM. (F) The quantitative chart of post-treatment with different condition

of wound healing assay. The amount of nanoparticles were 100 µg/mL. (n=3 per group). [Data are mean ± S.D., \*  $p < 0.05$ , \*\*  $p < 0.01$ , \*\*\*  $p < 0.001$ , \*\*\*\*  $p < 0.0001$ ].

**Supplementary Table S1.** DLS measurements of MSNs. (n=3 per group). [Data are mean ± S.D.].

| Sample          | Z-average (d.nm) / PDI |                         |
|-----------------|------------------------|-------------------------|
|                 | D <sub>h</sub> in PBS  | D <sub>h</sub> in Water |
| MSN@PEG/PEI     | 91.66 ± 0.707 / 0.094  | 83.62 ± 1.511 / 0.104   |
| MSN@PEG/PEI-OGP | 107.8 ± 1.054 / 0.124  | 100.3 ± 1.059 / 0.100   |

**Supplementary Table S2.** Complete blood count of the rabbits implanted treated with different condition after 4 weeks post-surgery. (n=3 per group). [Data are mean ± S.D.].

| Item                             | References                             | Mg <sub>66</sub> Zn <sub>29</sub> Ca <sub>5</sub> BMG | Mg <sub>66</sub> Zn <sub>29</sub> Ca <sub>5</sub> BMG +<br>MSN@PEG/PEI-<br>OGP | Mg <sub>66</sub> Zn <sub>29</sub> Ca <sub>5</sub> BMG<br>+ OGP |
|----------------------------------|----------------------------------------|-------------------------------------------------------|--------------------------------------------------------------------------------|----------------------------------------------------------------|
| Lymphocytes<br>(LYM)             | 35-85%<br>( $3 - 9 \times 10^9$ /L)    | 36.57 ± 17.39<br>(2.53 ± 0.82)                        | 51.43 ± 12.69<br>(3.00 ± 1.06)                                                 | 65.77 ± 3.59<br>(4.94 ± 0.64 )                                 |
| White Blood Cells<br>(WBC)       | $5-13 \times 10^9$ /L                  | 7.73 ± 3.18                                           | 5.82 ± 1.21                                                                    | 7.55 ± 1.21                                                    |
| Neutrophils<br>(NEU)             | 20-75%                                 | 47.63 ± 17.18                                         | 32.80 ± 8.03                                                                   | 23.30 ± 3.05                                                   |
| Monocyte<br>(Mono)               | 1-4%<br>( $< 0.5 \times 10^9$ /L)      | 6.93 ± 0.58<br>(0.53 ± 0.2)                           | 8.77 ± 3.48<br>(0.52 ± 0.27)                                                   | 5.17 ± 0.74<br>(0.39 ± 0.10)                                   |
| Eosinophils<br>(EO)              | 0-4%                                   | 0.47 ± 0.55                                           | 0.93 ± 0.38                                                                    | 1.77 ± 0.15                                                    |
| Basophils<br>(BASO)              | 2-7%                                   | 8.40 ± 1.90                                           | 6.07 ± 1.67                                                                    | 4.00 ± 0.62                                                    |
| Red Blood Cells<br>(RBC)         | $4-7 \times 10^{12}$ /L                | 5.13 ± 0.86                                           | 4.93 ± 0.45                                                                    | 6.26 ± 0.44                                                    |
| Hemoglobin<br>(HB)               | 10.0-15.5 g/dl                         | 9.67 ± 1.69                                           | 10.60 ± 1.04                                                                   | 13.20 ± 0.98                                                   |
| Mean Corpuscular<br>Volume (MCV) | 50~75 mm <sup>3</sup>                  | 58.33 ± 0.81                                          | 67.03 ± 1.50                                                                   | 66.47 ± 1.54                                                   |
| Platelets<br>(PLT) ×             | $250-270 \times 10^3$ /mm <sup>3</sup> | 308.67 ± 135.49                                       | 244.33 ± 57.07                                                                 | 223.67 ± 53.98                                                 |

**Supplementary Table S3.** Serum biochemistry of the rabbits treated with different condition after 4 weeks post-surgery. (n=3 per group). [Data are mean  $\pm$  S.D.].

| Item                                  | References            | Mg <sub>66</sub> Zn <sub>29</sub> Ca <sub>5</sub> BMG | Mg <sub>66</sub> Zn <sub>29</sub> Ca <sub>5</sub> BMG + MSN@PEG/PEI-OGP | Mg <sub>66</sub> Zn <sub>29</sub> Ca <sub>5</sub> BMG + OGP |
|---------------------------------------|-----------------------|-------------------------------------------------------|-------------------------------------------------------------------------|-------------------------------------------------------------|
| <b>Creatinine (CREA)</b>              | <b>0.8-1.8 mg/dL</b>  | 0.73 $\pm$ 0.35                                       | 0.87 $\pm$ 0.12                                                         | 1.13 $\pm$ 0.06                                             |
| <b>Blood Urea Nitrogen (BUN)</b>      | <b>10-24 mg/dL</b>    | 18.00 $\pm$ 8.19                                      | 17.00 $\pm$ 6.24                                                        | 17.67 $\pm$ 4.16                                            |
| <b>Total Bilirubin (TBIL)</b>         | <b>0.3-0.8 mg/dL</b>  | 0.27 $\pm$ 0.21                                       | 0.23 $\pm$ 0.15                                                         | 0.17 $\pm$ 0.12                                             |
| <b>Albumin (ALB)</b>                  | <b>2.7-4.6 g/dL</b>   | 2.57 $\pm$ 0.32                                       | 3.00 $\pm$ 0.30                                                         | 3.03 $\pm$ 0.15                                             |
| <b>Alanine Aminotransferase (ALT)</b> | <b>31-53 U/L</b>      | 61.33 $\pm$ 23.18                                     | 54.00 $\pm$ 7.55                                                        | 44.00 $\pm$ 11.27                                           |
| <b>Alkaline Phosphatase (ALKP)</b>    | <b>70-145 U/L</b>     | 39.67 $\pm$ 16.29                                     | 44.76 $\pm$ 4.73                                                        | 58.00 $\pm$ 10.15                                           |
| <b>Magnesium (Mg)</b>                 | <b>1.95-2.9 mg/dL</b> | 3.29 $\pm$ 0.73                                       | 2.28 $\pm$ 0.46                                                         | 2.56 $\pm$ 0.03                                             |
